# Supplementary material for: Microscale Mineral and Pore Structure Characterization of the Low‐Permeability Sandstone in the Ordos Basin, China
Source: Hindawi journal article supplement (doi:10.1155/2021/6448271), 2021-01-01
Supplement: f1 [file 6448271.f1.docx]

**Table S1 Statistics of debris components, %**

Max-Maximum; Min-Minimum; Ave-Average; TQ-Total Quantity; Q- Quartz; F-Feldspar; De-Debris; ER-Effusive Rock; Ap-Aphanite; HMR-High pressure Metamorphic Rocks; Qu-Quartzite; Sc-Schist; P-Phyllite; Sl-Slate; MS-Metamorphic Sandstone; Mu-Mudstone; Do-Dolomite; L-Limestone; Mi-Mica.

| Layers | TQ | Q | F | De | ER | Ap | HMR | Qu | Sc | P | Sl | MS | Mu | Do | L | Mi |
| --- | --- | --- | --- | --- | --- | --- | --- | --- | --- | --- | --- | --- | --- | --- | --- | --- |
| Max | 90.0 | 60.0 | 39.0 | 34.2 | 5.0 | 4.5 | 2.0 | 4.5 | 3.0 | 4.5 | 2.5 | 1.5 | 1.2 | 10.0 | 13.0 | 20.2 |
| Min | 74.6 | 24.6 | 12.0 | 10.0 | 0.0 | 0.0 | 0.0 | 0.5 | 0.0 | 0.2 | 0.4 | 0.0 | 0.0 | 0.5 | 0.0 | 1.0 |
| Ave | 84.4 | 44.9 | 22.8 | 19.2 | 2.7 | 1.2 | 0.6 | 2.1 | 0.7 | 2.7 | 1.1 | 0.6 | 0.3 | 3.2 | 2.5 | 5.2 |

**Table S2 Statistics of cement composition, %**

Max-Maximum; Min-Minimum; Ave-Average; Ka-Kaolinite; Hy-Hydromica; Ch-Chlorite; Fe-Ferrocalcite; An- Ankerite; Sid-Siderite; Sil-Silicic; Fel-Feldspathic; Py-Pyrite; An-Anhydrite.

| Layers | Ka | Hy | Ch | FeR | An | Sid | Sil | Fel | Py | An |
| --- | --- | --- | --- | --- | --- | --- | --- | --- | --- | --- |
| Max | 10.0 | 13.0 | 5.5 | 0.0 | 14.0 | 5.0 | 0.0 | 8.2 | 0.5 | 0.0 |
| Min | 0.0 | 0.5 | 0.0 | 0.0 | 0.0 | 0.0 | 0.0 | 0.0 | 0.0 | 0.0 |
| Ave | 3.7 | 3.4 | 0.9 | 0.0 | 5.5 | 2.1 | 0.0 | 2.7 | 0.2 | 0.0 |

**Table S3 Mercury pressure parameters of the reservoir in the study area**

APV-Average Pore-throat Value; SC-Sorting Coefficient; ATR-Average Throat Radius; MPS-Mean Pressure of Saturation; MR-Median Throat Radius; DP-Displacement Pressure; MPR-Maximum Connected Pore-throat Radius; MMS-Maximum Mercury Saturation; EE-Efficiency of Exit; RMS-Residual Mercury Saturation; APR-Average Pore-throat Volume Ratio.

| No. | APV | SC | ATR,μm | MPS, MPa | MR, μm | DP, MPa | MPR, μm | MMS, % | EE,% | RMS, % | APR |
| --- | --- | --- | --- | --- | --- | --- | --- | --- | --- | --- | --- |
| G2 | 12.21 | 0.97 | 0.25 | 13.45 | 0.05 | 2.63 | 0.28 | 67.48 | 29.82 | 47.35 | 3.35 |
| Z52 | 12.10 | 0.90 | 0.26 | 11.31 | 0.07 | 2.73 | 0.27 | 66.42 | 25.50 | 49.49 | 3.92 |
| N42 | 10.54 | 1.99 | 2.07 | 2.43 | 0.30 | 0.32 | 2.33 | 81.74 | 29.08 | 57.97 | 3.44 |
| Z140 | 11.40 | 1.28 | 0.37 | 2.82 | 0.26 | 1.05 | 0.70 | 97.63 | 19.84 | 78.26 | 5.04 |
| Z77 | 10.42 | 1.71 | 1.04 | 1.63 | 0.45 | 0.35 | 2.09 | 78.05 | 33.21 | 52.13 | 3.01 |
